1 **Synergistic stabilization of a double mutant in Cl2 from an *in-cell* library**  
2 **screen**

3

4 Louise Hamborg<sup>1,2</sup>, Daniele Granata<sup>1</sup>, Johan G. Olsen<sup>1</sup>, Jennifer Virginia Roche<sup>1</sup>, Lasse Ebdrup  
5 Pedersen<sup>2</sup>, Alex Toftgaard Nielsen<sup>2</sup>, Kresten Lindorff-Larsen<sup>1</sup>, Kaare Teilum<sup>1#</sup>

6

7 <sup>1</sup>Structural Biology and NMR Laboratory and the Linderstrøm-Lang Centre for Protein Science,  
8 Department of Biology, University of Copenhagen, Ole Maaloes Vej 5, 2200 Copenhagen N,  
9 Denmark

10 <sup>2</sup>The Novo Nordisk Foundation Center for Biosustainability, Technical University of Denmark,  
11 Kemitorvet, 2800 Kgs. Lyngby, Denmark

12

13 #Corresponding author

14 Phone: +45 35 32 20 29

15 Postal Address: Ole Maaloes Vej 5, 2200 Copenhagen N, Denmark

16 Email: [kaare.teilum@bio.ku.dk](mailto:kaare.teilum@bio.ku.dk)

17

18

19

20 **Abstract**

21 Most single point mutations destabilize folded proteins. Mutations that stabilize a protein typically  
22 only have a small effect and multiple mutations are often needed to substantially increase the  
23 stability. Multiple point mutations may act synergistically on the stability, and it is not  
24 straightforward to predict their combined effect from the individual contributions. Here, we have  
25 applied an efficient *in-cell* assay to select variants of the barley chymotrypsin inhibitor 2 with  
26 increased stability. We find two variants that are more than 3.8 kJ/mol more stable than the wild-  
27 type. In one case the increased stability is the effect of the single substitution D55G. The other  
28 case is a double mutant, L49I/I57V, which is 5.1 kJ/mol more stable than the sum of the effects of  
29 the individual mutations. In addition to demonstrating the strength of our selection system for  
30 finding stabilizing mutations, our work also demonstrate how subtle conformational effects may  
31 modulate stability.

32

33

## 34 Introduction

35 Understanding how the stability of a protein changes when an amino acid residue is changed is  
36 fundamental for several biological processes and the aetiology of many diseases (Stein et al.,  
37 2019). For using proteins in biotechnological and biopharmaceutical applications it is often an  
38 advantage that the proteins have long shelf-lives and are not degraded too rapidly during the  
39 applications (Modarres et al., 2016). Our ability to engineer proteins with increased stability or to  
40 understand how amino acid changes cause decreased stability has thus been the subject of large  
41 number of studies.

42 We recently described a system based on recombinant expression in *E. coli*, that can be  
43 used to measure both protein translation and folding stability *in vivo* (Figure 1a) (Zutz et al., 2020).  
44 The translation sensor is based on an RNA hairpin structure inserted into a polycistronic mRNA  
45 coding for the protein of interest and for the fluorescent protein mCherry, thus making it possible  
46 to read out efficient translation through a red fluorescent signal. The protein folding and stability  
47 sensor is based on GFP-ASV, an unstable GFP variant, through a system engineered to be  
48 expressed as a response to protein misfolding, and the green fluorescence is used as a proxy for *in*  
49 *vivo* protein stability. This misfolding response relies on a heat shock promoter, *lbpAp*, and the *E.*  
50 *coli* heat shock system. With increasing levels of protein misfolding, more of the chaperone DnaK  
51 will bind the misfolded protein instead of the *E. coli* heat shock sigma factor, RpoH. In the absence  
52 of DnaK, RpoH can participate in assembly of the RNA polymerase sigma 32 complex, which can  
53 drive transcription from the *lbpAp* promoter. The presence of misfolded protein that can bind  
54 DnaK thus results in the expression of GFP and a green fluorescence signal. By expressing libraries  
55 of random mutations in a given protein in this bacterial sensor system and analysing the cells by  
56 fluorescence-activated cell sorting (FACS), it is possible to select large sets of protein variants that

57 retain a folded structure, thus avoiding complications from using a functional assay as a proxy for  
58 folding stability.

59 An alternative to screening mutant libraries for proteins with altered stability is to calculate  
60 the effect of substituting amino acids and find variants with the desired properties. Several  
61 computational tools have been developed that predict the change in free energy for folding ( $\Delta\Delta G_f$ )  
62 between a wild-type protein and a mutant (Capriotti et al., 2005; Dehouck et al., 2009;  
63 Goldenzweig et al., 2018; Guerois et al., 2002; Jochens et al., 2010; Kaufmann et al., 2010; Kellogg  
64 et al., 2010; Pandurangan et al., 2017; Parthiban et al., 2006; Reetz et al., 2006; Rohl et al., 2004;  
65 Schymkowitz et al., 2005; Steipe et al., 1994; Sullivan et al., 2012; Trudeau et al., 2014; Wijma et  
66 al., 2014; Yamashiro et al., 2010). In general, the methods perform rather well when predicting the  
67 effects of destabilizing mutations but often fail in predicting stabilizing mutations (Foit et al.,  
68 2009). A comparison of several stability predictors showed an average correlation of around 0.6  
69 between experimentally determined and computed changes in stability for all types of mutations  
70 (Khan and Vihinen, 2010; Potapov et al., 2009). The algorithms are better at predicting deletion  
71 mutations in the hydrophobic core, than mutations that increase the size of the side chain,  
72 mutations on the protein surface and mutations where electrostatic interactions contribute to the  
73 stabilization. This is partly a result of the data available for training the algorithms that mainly  
74 consist of deletion mutations in the hydrophobic core (Gromiha et al., 2016). A particular  
75 challenge in predicting stabilizing protein variants is that among the few single substitutions that  
76 are actually stabilizing the effects are often small, so that multiple substitutions may be needed to  
77 create a substantial stabilizing effect (Goldenzweig et al., 2018). As the effects of the mutations  
78 are not always independent, and non-additivity may result in both positive or negative epistasis  
79 (Bershtein et al., 2006; Sarkisyan et al., 2016), it can be difficult to predict the stability of proteins

80 with multiple substitutions. One way to improve the computational methods is to generate  
81 stability data on a larger set of protein variants generated to scan sequence space better than the  
82 current available datasets and including also stabilizing variants.

83 Here, we have applied the bacterial sensor to select variants from a library of random  
84 mutations of barley chymotrypsin inhibitor 2 (CI2) to broadly cover sequence and stability space.  
85 CI2 is a small single domain protein of 64 residues, which has been extensively used as a model to  
86 understand key concepts of protein folding and stability (Itzhaki et al., 1995; Jackson et al., 1993;  
87 Jackson and Fersht, 1991a, 1991b; Neira et al., 1997). Our aim in the current work was two-fold.  
88 First, we wanted to demonstrate how the sensor system can be used to select for proteins with  
89 increased stability. Second, we aimed to generate a set of data for benchmarking and later  
90 optimization of stability predictors. While many of the 25 variants for which we measured the  
91 stability, destabilize CI2, we found two variants, L49I/I57V and D55G, that are significantly  
92 stabilized relative to wild-type CI2. For L49I/I57V there is a strong positive synergistic effect  
93 between the two substitutions and this variant is stabilized by 5.1 kJ/mol more than the sum of  
94 the individual effects of the two single variants. A detailed analysis of the structural changes in  
95 L49I/I57V suggests that several subtle long-range effects underlie the high stability gain.

96

## 97 **Results**

### 98 *FACS sorting libraries of random CI2 variants*

99 CI2 is a highly stable protein with free energy for folding,  $\Delta G_f = 31$  kJ/mol (Hamborg et al., 2020;  
100 Itzhaki et al., 1995) and, as previously shown (Zutz et al., 2020), when wild-type CI2 is expressed in  
101 the bacterial sensor system (Figure 1a) only little GFP is produced (Figure 1b). The dynamic range  
102 of the GFP signal towards discovering stabilized variants (i.e. less GFP) is thus very small. A library

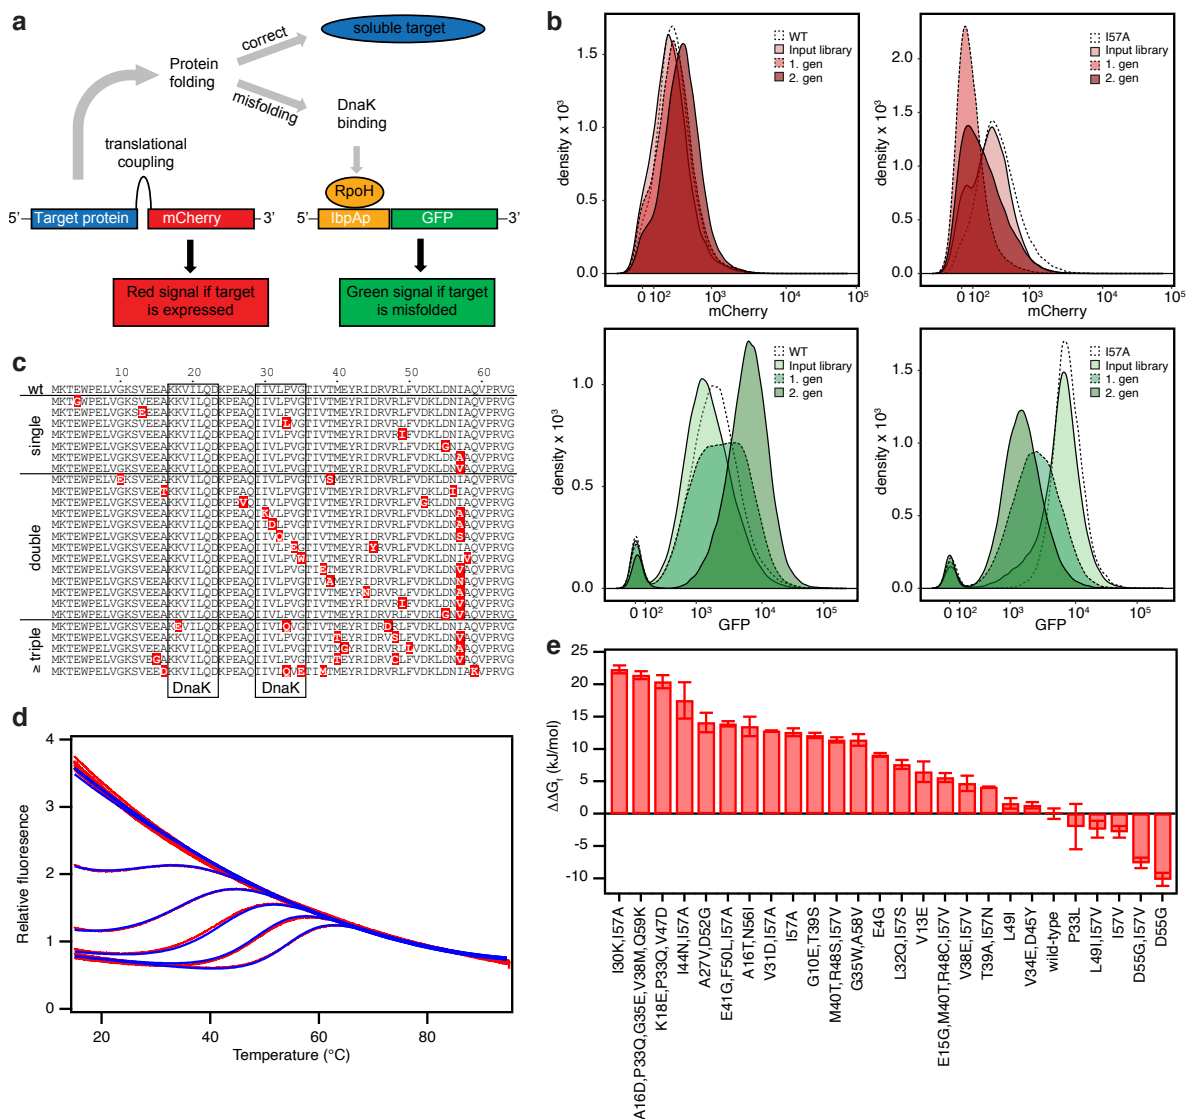

**Figure 1.** Selection and stability of CI2 variants. **(a)** Overview of the bacterial folding sensor. The expression of mCherry is linked to the expression of the target protein. Cells expressing a target protein will thus also have red fluorescence. The expression of GFP is linked to the presence of misfolded protein. Cells expression a target protein with high tendency of misfolding will thus have a high level of green fluorescence. **(b)** FACS profiles of *E. coli* cultures expressing libraries of random mutations in wild-type CI2 (left column) and in CI2,I57A (right column). mCherry fluorescence and GPF fluorescence are shown in the upper and lower rows, respectively. Profiles for the background variants of CI2, the input mutant library and the two rounds of sorting are shown. **(c)** Sequence alignment of 26 CI2 variants purified and showing two-state behaviour in equilibrium stability measurements. **(d)** Thermal unfolding curves of CI2,I57A measured by fluorescence at 350 nm at 13 concentrations of GuHCl ranging from 0 to 5 M. The experimental data are shown in red and the fits to a model for two-state folding as blue lines. **(e)** Difference in conformational stability,  $\Delta\Delta G_f$ , relative to wild-type CI2 for 26 variants. The error bars are the standard deviation on  $\Delta G_f$  listed in Table 1 that was propagated from the standard deviations on  $T_m$ ,  $\Delta H_m$  and  $\Delta C_p$  obtained from the non-linear global fits of the fluorescence unfolding data.

103 of random mutations in wild-type CI2 will thus be most suited for selecting variants with stabilities  
 104 that are lower than the wild-type protein but that are still able to fold. To select variants of CI2

105 that are more stable than the starting point we therefore opted to use a destabilized background  
106 as starting point. The I57A variant of CI2 is significantly destabilized ( $\Delta G_f = 14$  kJ/mol) and results in  
107 a high GFP signal in the sensor system (Figure 1b). With a library of random mutations in I57A  
108 there will be a large dynamic range in the GFP signal towards more stable variants with less GFP.  
109 This library will thus be suited for selecting variants of CI2 with stabilities higher than I57A.  
110 Consequently, we prepared two libraries of random mutations with expected mutation  
111 frequencies of 0-4 amino acid residues per gene in the background of the wild-type sequence and  
112 of the I57A sequence, respectively.

113 The mutant libraries that had sizes of 16000 – 80000 were expressed in the dual-sensor  
114 system in *E. coli* and analysed by FACS after one hour of induced protein expression. As expected,  
115 the GFP fluorescence observed in the initial FACS run of the library made from wild-type CI2 is low  
116 and similar to that seen for an *E. coli* culture expressing non-mutagenized wild-type CI2 in the  
117 sensor system (Figure 1b). To screen for destabilized protein variants in this library, cells were  
118 sorted for high GFP fluorescence, defined as the upper 1-10 % of the GFP signal. The selected cells  
119 were grown and sorted twice more using the same criteria (Figure 1b). After each round of sorting,  
120 a clear shift in the GFP fluorescence is observed corresponding to an enrichment of clones  
121 expressing CI2 variants with decreased stability compared to the wild-type protein. In the same  
122 way, the library made in the I57A background was repeatedly sorted for the lower 1-10 % of the  
123 GFP signal, resulting in a clear shift from high to low GFP fluorescence (Figure 1b) and enrichment  
124 of the library with clones expressing CI2 variants that activate the misfolding sensor less compared  
125 to I57A.

126

127 *Selecting variants for further analysis*

128 To identify the protein variants in the two final libraries we randomly selected 118 clones from the  
129 library starting from the wild-type sequence and 289 clones from the library starting from the I57A  
130 sequence by collection of single cells from the last rounds of FACS screening. These clones were  
131 characterised by Sanger sequencing. In addition, we also sequenced the final I57A library by next-  
132 generation sequencing (NGS). In total we found 71 unique sequences without stop codons,  
133 deletions or insertions in the region encoding the 64 amino acid residues of CI2. 41 of the  
134 sequences were from the wild-type library and 30 sequences were from the I57A library (Figure  
135 S1).

136 To express and purify the 71 CI2 variants, they were subcloned into pET11a without the  
137 hexa-His tag, which is part of the folding sensor system. The presence of this C-terminal His-tag  
138 interferes with key interactions of the CI2 C-terminal carboxylate and compromises the stability of  
139 the protein during purification. However, the destabilization gives just the right stability window  
140 for finding variants with altered stability in the sensor system. Thus, the FACS selection was done  
141 on CI2 libraries with the His-tag, whereas the *in vitro* stability measurements were performed on  
142 CI2 variants without the His-tag.

143 Although we selected for protein variants that do not activate the misfolding sensor, some  
144 of the variants still did not behave well in the expression system and did not result in pure protein.  
145 Of the remaining variants, some did not give useful data in the equilibrium unfolding experiment  
146 due to aggregation or multi-state behaviour. We thus ended with 13 unique variants in the wild-  
147 type background and 12 unique variants in the I57A background that could be used for stability  
148 measurements (Figure 1c). In the set of variants that we have analysed we also included L49I and  
149 D55G (*vide infra*).



150 We note that a large proportion of the variants that were not included in the final set  
151 included substitutions in the DnaK binding sites predicted at positions 17-23 and 29-35 (Durme et  
152 al., 2009), with the second predicted to be the strongest (Figure S2a). As these variants are  
153 expected to interact less well with DnaK, less GFP will also be expressed and they will have the  
154 same signature of GFP fluorescence as variants with increased stability even if they are severely  
155 destabilized. Examples include substitutions at positions 29 (I29N, I29T), 30 (I30K), 31 (V31D,  
156 V31G) and 34 (V34E) that are all predicted to decrease DnaK binding (Figure S2b), and several of  
157 these were found in multiple of the variants that could not be purified.

158 To measure the *in vitro* stability for folding we used our recently described combined two-  
159 dimensional thermal and chemical protein unfolding assay, where the unfolding of the protein is  
160 followed by the change in intrinsic Trp fluorescence as the temperature is increased at multiple  
161 concentrations of denaturant (Figure 1d) (Hamborg et al., 2020). The stabilities of the 27 CI2  
162 variants cover a broad range from -7.4 kJ/mol to -38.5 kJ/mol including five variants that are more  
163 stable than the wild-type protein (Table 1 and Figure 1e). We find a strong correlation between  
164  $\Delta G_f$  at 25°C and the melting temperature,  $T_m$ , which may thus be used as an additional parameter  
165 for comparing the stability. Except P33L, all variants selected in the wild-type background are  
166 destabilized and scattered throughout the sequence. P33L is stabilized by 1.5 kJ/mol but  
167 aggregates when the temperature is above 50 °C unless [GuHCl] > 2 M. All variants selected in the  
168 I57A background that are more stable than this background have a valine at position 57; we note  
169 that our starting point was designed to avoid random reversion to isoleucine by single nucleotide  
170 mutations (see Discussion). From previous work it is known that I57V is slightly more stable than  
171 the wild-type protein (Itzhaki et al., 1995), and valine at position 57 is also preferred in CI2 from  
172 many other plant species (Lawrence et al., 2010). Most other mutations that occur together with

173 **Table 1.** Thermodynamic data for purified variants of Cl2 identified with the folding sensor.

| Variant                      | $T_m$ (K)          | $\Delta H_m$ (kJ/mol) | $\Delta C_p$ (kJ/mol/K) | $m$ (kJ/mol/M)   | $\Delta G_f$ (kJ/mol) | $[D]_{50\%}$ (M) |
|------------------------------|--------------------|-----------------------|-------------------------|------------------|-----------------------|------------------|
| #I30K, I57A                  | 327.4 ± 3.1        | 99 ± 11               | 0.4 ± 0.8               | 8.8 ± 1.8        | -8.2 ± 0.6            | 0.9 ± 0.2        |
| A16D, P33Q, G35E, V38M, Q59K | 333.3 ± 1.9        | 134 ± 9               | 2.6 ± 0.3               | 5.4 ± 0.5        | -9.1 ± 0.6            | 1.7 ± 0.2        |
| K18E, P33Q, V47D             | 336.0 ± 1.7        | 147 ± 10              | 2.9 ± 0.1               | 4.3 ± 0.2        | -10.1 ± 1.0           | 2.3 ± 0.2        |
| #I44N, I57A                  | 339.0 ± 2.4        | 163 ± 28              | 2.6 ± 0.4               | 7.4 ± 1.5        | -13.0 ± 2.8           | 1.8 ± 0.5        |
| A27V, D52G                   | 341.7 ± 1.0        | 211 ± 19              | 3.6 ± 0.3               | 6.0 ± 0.8        | -16.4 ± 1.5           | 2.7 ± 0.4        |
| #E41G, F50L, I57A            | 331.6 ± 0.5        | 191 ± 3               | 1.5 ± 0.1               | 11.5 ± 0.2       | -16.6 ± 0.4           | 1.4 ± 0.0        |
| A16T, N56I                   | 339.4 ± 0.6        | 227 ± 19              | 4.1 ± 0.3               | 7.0 ± 0.4        | -17.0 ± 1.5           | 2.4 ± 0.2        |
| #V31D, I57A                  | 344.7 ± 0.5        | 222 ± 0               | 3.7 ± 0.0               | 7.0 ± 0.0        | -17.7 ± 0.1           | 2.5 ± 0.0        |
| #I57A                        | 333.1 ± 0.5        | 269 ± 14              | 5.4 ± 0.5               | 11.6 ± 0.6       | -17.9 ± 0.6           | 1.5 ± 0.1        |
| G10E, T39S                   | 339.7 ± 0.7        | 238 ± 16              | 4.0 ± 0.7               | 8.5 ± 0.5        | -18.4 ± 0.4           | 2.2 ± 0.1        |
| #M40T, R48S, I57V            | 344.3 ± 0.3        | 235 ± 9               | 3.8 ± 0.2               | 7.1 ± 0.1        | -19.1 ± 0.4           | 2.7 ± 0.1        |
| G35W, A58V                   | 336.8 ± 0.1        | 281 ± 19              | 5.7 ± 0.5               | 6.9 ± 0.2        | -19.1 ± 0.9           | 2.8 ± 0.1        |
| E4G                          | 341.5 ± 0.1        | 259 ± 7               | 4.0 ± 0.2               | 7.3 ± 0.1        | -21.4 ± 0.3           | 2.9 ± 0.1        |
| L32Q, I57S                   | 348.1 ± 0.6        | 275 ± 5               | 4.4 ± 0.0               | 6.1 ± 0.2        | -22.9 ± 0.7           | 3.8 ± 0.2        |
| #V13E                        | 343.1 ± 0.2        | 280 ± 23              | 4.1 ± 0.5               | 9.6 ± 0.6        | -24.0 ± 1.6           | 2.5 ± 0.2        |
| #E15G, M40T, R48C, I57V      | 347.6 ± 0.1        | 281 ± 8               | 4.1 ± 0.1               | 8.3 ± 0.2        | -24.9 ± 0.7           | 3.0 ± 0.1        |
| #V38E, I57V                  | 348.8 ± 0.3        | 295 ± 16              | 4.4 ± 0.3               | 8.9 ± 0.5        | -25.8 ± 1.2           | 2.9 ± 0.2        |
| T39A, I57N                   | 343.5 ± 0.2        | 312 ± 0               | 4.7 ± 0.0               | 10.6 ± 0.1       | -26.4 ± 0.1           | 2.5 ± 0.0        |
| L49I                         | 350.3 ± 0.2        | 322 ± 8               | 4.6 ± 0.1               | 8.7 ± 0.2        | -28.9 ± 0.8           | 3.3 ± 0.1        |
| V34E, D45Y                   | 344.3 ± 0.0        | 363 ± 7               | 6.0 ± 0.2               | 8.4 ± 0.2        | -29.2 ± 0.5           | 3.5 ± 0.1        |
| <b>wild-type</b>             | <b>352.3 ± 0.2</b> | <b>322 ± 11</b>       | <b>4.3 ± 0.2</b>        | <b>8.2 ± 0.1</b> | <b>-30.5 ± 0.8</b>    | <b>3.7 ± 0.1</b> |
| P33L                         | 354.1 ± 0.5        | 330 ± 43              | 4.2 ± 0.7               | 8.3 ± 0.8        | -32.5 ± 3.5           | 3.9 ± 0.6        |
| #L49I, I57V                  | 356.2 ± 0.3        | 332 ± 13              | 4.2 ± 0.2               | 7.9 ± 0.4        | -32.9 ± 1.3           | 4.2 ± 0.3        |
| #I57V                        | 354.5 ± 0.2        | 349 ± 12              | 4.7 ± 0.2               | 8.3 ± 0.2        | -33.3 ± 0.9           | 4.0 ± 0.1        |
| #D55G, I57V                  | 361.6 ± 0.3        | 364 ± 13              | 4.3 ± 0.2               | 8.5 ± 0.2        | -38.1 ± 0.8           | 4.5 ± 0.1        |
| D55G                         | 361.1 ± 0.1        | 378 ± 10              | 4.7 ± 0.1               | 8.5 ± 0.2        | -38.4 ± 1.0           | 4.5 ± 0.2        |

174 #Variant selected from the I57A library.

175 I57V are less stable than I57V alone, but still more stable than the I57A background. There are  
176 however two exceptions. Both the L49I/I57V and D55G/I57V are even further stabilized than I57V.  
177 Both I at position 49 and G at position 55 are often seen in CI2 from other species (Lawrence et al.,  
178 2010). The L49I and D55G variants have not previously been characterized so we also included  
179 these single variants in our analysis.

180

### 181 *Comparing with computational stability predictors*

182 To compare how well the stability of the selected set of CI2 variants can be predicted  
183 computationally we used FoldX, Rosetta and a sequence-based method that analyses variability in  
184 a multiple sequence alignment of homologous sequences (hereafter referred to as SEQ), to  
185 calculate  $\Delta\Delta G_f$  for each variant (Figure 2). The overall performances of these computational  
186 methods on our CI2 variants are similar to benchmarks tests on other sets of proteins (Khan and  
187 Vihinen, 2010; Potapov et al., 2009). The Pearson's correlation coefficients ( $r$ ) of the  
188 experimentally determined values with those calculated using FoldX, Rosetta and SEQ are 0.81,  
189 0.74 and 0.72, respectively. In general, the three stability predictors agree in the overall effect of  
190 mutations, but they are inconsistent in the exact value. Importantly, while the methods are

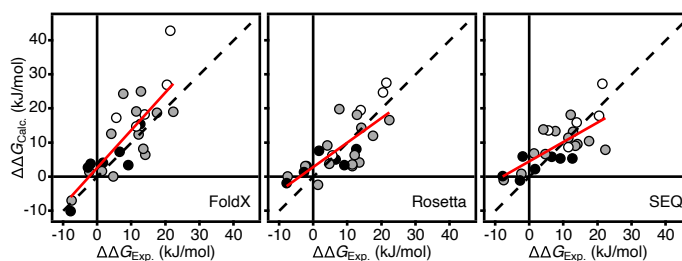

**Figure 2.** Correlations between experimentally determined and predicted  $\Delta\Delta G_f$  values. The predicted values were calculated by FoldX, Rosetta and SEQ as indicated in the lower right part of each panel. The dotted line shows the identity line and the solid red line is the best fit straight line. Each data point represents one of the variants in Table 1 and the data points are coloured according to the number of amino acid substitutions (black – one substitution; grey – two substitutions; white – three or more substitutions). The scale for the SEQ method is in arbitrary units.

191 relatively good at predicting destabilizing effects, they are generally not able to predict stabilized  
192 variants, though FoldX does predict D55G to be highly stabilizing.

### 193 *Analysis of double mutant cycles*

194 In an attempt to understand better the origin of the increased stability of the two double mutants  
195 (D55G/I57V and L49I/I57V), we performed a more detailed analysis of the thermodynamic cycles  
196 from the wild-type through the single mutants to the double mutants. To compare the variants in  
197 the two double mutant cycles we re-analysed the stability data assuming a common  $m$ -value of  
198  $8.4 \pm 0.3$  kJ/mol/M corresponding to the average of the  $m$ -values for wild-type, L49I, D55G, I57V,  
199 D55G/I57V and L49I/I57V listed in Table 1. As long as there is no significant change in the solvent  
200 accessible surface area exposed upon unfolding the  $m$ -value is also expected not to change (Myers  
201 et al., 1995). As done previously (Itzhaki et al., 1995), we have therefore used the average  $m$ -value  
202 for comparing differences in the free energy for folding ( $\Delta\Delta G_f$ ). The normalized stability curves  
203 originating from this analysis are shown in Figure 3a. Relative to the wild-type, I57V is stabilized by  
204  $\Delta\Delta G_f = -2.2 \pm 0.1$  kJ/mol (Figure 3b). For D55G  $\Delta\Delta G_f = -6.9 \pm 0.3$  kJ/mol and combining D55G and  
205 I57V leads to no further stabilization ( $\Delta\Delta G_f = -6.5 \pm 0.2$  kJ/mol). Indeed, the two mutations have  
206 an unfavourable synergistic effect,  $\Delta\Delta\Delta G_f$ , of  $2.6 \pm 0.4$  kJ/mol. In contrast, introducing L49I, which  
207 on its own destabilizes by  $\Delta\Delta G_f = 3.4 \pm 0.1$  kJ/mol, together with I57V results in a total stabilization  
208 of the L49I/I57V double mutant of  $\Delta\Delta G_f = -3.8 \pm 0.1$  kJ/mol. In this case the synergistic effect of  
209 introducing both L49I and I57V is  $\Delta\Delta\Delta G_f -5.1 \pm 0.2$  kJ/mol.

210 To evaluate if the observed effects of the double mutants could have been predicted, we  
211 compared with the expected  $\Delta\Delta G_f$  from FoldX, Rosetta and SEQ. Particularly, FoldX does a good  
212 job in predicting the effects of the L49I and D55G mutations (Figure 3b). None of the tools work  
213 well for predicting  $\Delta\Delta G_f$  for I57V or L49I/I57V. FoldX predicts the effect of D55G/I57V rather well,

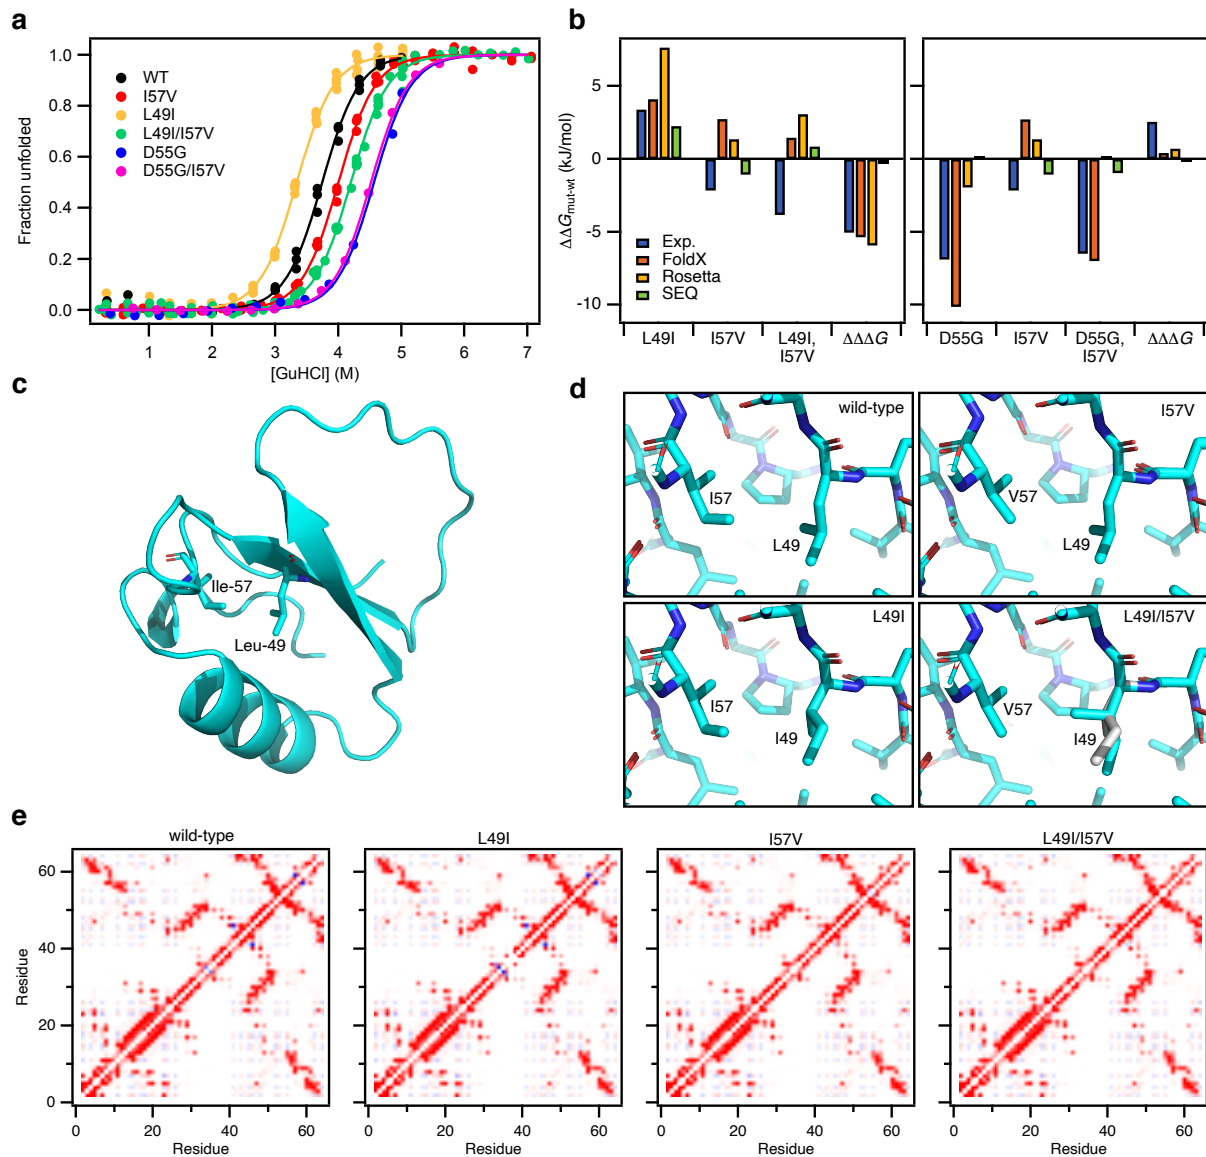

**Figure 3.** Stability and structural analysis of stabilized CI2 double mutants. **(a)** Equilibrium stability curves of CI2 mutants at 25 °C. The experimental data (filled circles) were fit to a model for two state folding (solid line) keeping the  $m$ -value fixed at 8.4 kJ/mol/M. The data are here normalized to show the degree of unfolding for direct comparison and visualization only. **(b)** Differences in stability relative to wild-type CI2,  $\Delta\Delta G_f$ , for the variants in the L49I/I57V (left) and D55G/I57V (right) double mutant cycles. Experimental  $\Delta\Delta G_f$  as well as  $\Delta\Delta G_f$  predicted by FoldX, Rosetta and SEQ are shown. The  $\Delta\Delta\Delta G$  is the additional contribution to the conformational stability of the double mutants compared to the sum of the contribution of the single mutants,  $\Delta\Delta G_{f,mut1/mut2} - (\Delta\Delta G_{f,mut1} + \Delta\Delta G_{f,mut2})$ . The energy for the SEQ method is in arbitrary units. **(c)** Overview of the structure of CI2 with the locations of L49 and I57. **(d)** Structural details around positions 49 and 57 in the four CI2 variants in the wild-type to L49I/I57V double mutant cycle. **(e)** Residue wise contact maps. The pairwise interaction energies were calculated from AMBER FF99 using IEM (Bendová-Biedermannová et al., 2008). The colour scale is from dark red (-8 kJ/mol) to dark blue (8 kJ/mol).

214 but this can be attributed to the dominating effect of the D55G mutation that was well predicted

215 on its own. It appears as if  $\Delta\Delta\Delta G_f$  of L49I/I57V is well predicted by both FoldX and Rosetta (Figure

216 3b). However, the individual  $\Delta\Delta G_f$  used for the calculations are not correct and in most cases the  
217 signs of the values are incorrect. We thus conclude that the outcome of the double mutations  
218 could not have been predicted.

219  
220 *Structural analysis*

221 The positive synergistic effect of L49I and I57V is interesting to investigate in more detail to gain  
222 insight into how proteins may be designed or evolve to become more stable. We therefore  
223 determined the crystal structures of all four CI2 variants in the wild-type to L49I/I57V double  
224 mutant cycle. Overall the structures of L49I, I57V and L49I/I57V are highly similar to the structure  
225 of the wild-type (Figure 3c) with RMSDs for the backbone of 0.16 Å, 0.45 Å and 0.17 Å. The larger  
226 RMSD for I57V is a result of the overhand loop in this structure adopting an alternative  
227 conformation compared to the other three structures. This conformation is similar to the  
228 conformation of the overhand loop in the older crystal structure of wild-type CI2 (PDB-code 2CI2)  
229 (McPhalen and James, 1987). Excluding residues 44-50 in this loop from the comparison reduces  
230 the backbone RMSD to the wild-type to 0.14 Å, 0.16 Å and 0.15 Å for L49I, I57V and L49I/I57V,  
231 respectively.

232         Around the mutated residues the structural changes are minimal (Figure 3d). The Val at  
233 position 57 in I57V and L49I/I57V superimpose, except for the missing  $\delta$ 1 methyl group, with the  
234 Ile at position 57 in the wild-type and L49I. The Ile at position 49 in L49I is oriented similarly to the  
235 Leu in wild-type and I57V. In the structure of the double mutant, however, we observe that the Ile  
236 at position 49 is found in two alternative conformations. The minor conformation, accounting for  
237 roughly 30% of the electron density, has a conformation similar to that seen in L49I. In the major  
238 conformation that accounts of the remaining 70% of the electron density, the  $\gamma$ 2 methyl is rotated

239 approximately 120° and points towards the position where the  $\delta$ 1 methyl group of the Ile at  
240 position 57 would be in the wild-type structure.

241 Analysis of the pairwise interaction energies at the residue level (Figure 3e) suggests that  
242 much of the stabilizing effect of the I57V mutation originates from an unfavourable interaction  
243 between I57 and Q59 that is observed in structures of both the wild-type and L49I. The effect of  
244 the L49I mutation, which destabilizes the wild-type, but stabilizes the I57V variant is more subtle  
245 and not easily explained from the crystal structures. It appears that some of the destabilization of  
246 the L49I mutation is a long-range effect resulting in several less favourable interactions among  
247 residues 57-62. These negative effects are relieved in the double mutant (Figure 3e).

248

## 249 **Discussion**

250 Using our bacterial stability sensor, we selected 25 stable and cooperatively folded variants of Cl2  
251 from libraries of random mutations. We thus demonstrate that the system can be used as a  
252 screening assay for methods like directed evolution and deep mutational scanning to select  
253 protein variants with both stabilizing and destabilizing effects originating from mutant libraries.  
254 When using the system, it is important that the dynamic range of GFP fluorescence will allow  
255 changes in stability to be observed. To select variants with increased stability and thus low GFP  
256 fluorescence, it is necessary that starting point for the mutagenesis has a relatively high GFP  
257 fluorescence and *vice versa*. Screening assays for higher protein stability are often applied when  
258 the starting point has low stability, and in such cases a high initial GFP signal is expected. In the  
259 case of Cl2, however, it was necessary to introduce the destabilizing I57A mutation to get a proper  
260 GFP signal of the background. The Ala was introduced by changing the 57<sup>th</sup> codon to GCG. To  
261 mutate this codon into an Ile codon three base substitutions are needed. It is thus highly unlikely

262 that a revertant to the wild-type will be generated by error prone PCR, and we indeed did not  
263 observe the wild-type sequence in this library. Instead the most abundant mutant after selection  
264 was I57V which can be made by a single base substitution from the Ala codon. As I57V is more  
265 stable than the wild-type this demonstrates the efficiency of the selection system. We note that  
266 mutations in the predicted DnaK binding sites of CI2 (Figure 1c) will also lead to decrease in the  
267 GFP signal and thus appear similar to mutations that stabilize the protein. This is seen for I30K and  
268 V31D selected in the I57A background that are highly unstable. Variants with amino acid  
269 substitutions in the DnaK binding site 17-23 could not even be purified, suggesting that the  
270 decreased GFP signal originates from decreased interactions with DnaK rather than increased  
271 protein stability. Indeed, while both I30K/I57A and I30K/I57V were selected to give decreased GFP  
272 signal compared to I57A, only I30K/I57V could successfully be purified. Thus, we expect that some  
273 of the variants that could not be purified reflect substitutions with intrinsically weaker DnaK  
274 binding in their unfolded states, rather than variants that restabilize I57A. This is supported by the  
275 distribution of predicted DnaK binding propensities for the variants that could not be purified that  
276 is shifted to lower scores compared to the distribution of those variants that were successfully  
277 purified (Figure S2c). We suggest that our sensor system in the future might also be used to screen  
278 for peptides that bind DnaK.

279 As all the variants selected from the I57A background carry either the I57A or the I57V it is  
280 not surprising that many double mutants were selected. Two of these (L49I/I57V and D55G/I57V)  
281 were highly stabilized, both relative to the I57A background but also more than the wild-type  
282 protein. In an attempt to understand the origin of this increased stability we also included the  
283 single mutants L49I and D55G in our analysis to make a thermodynamic double mutant cycle. For  
284 D55G/I57V the increased stability is almost completely an effect of the D55G mutation. We



285 suggest that is a result of the residue at position 55 being located in the  $\alpha_L$  region of the  
286 Ramachandran map, where Gly is even more common than Asp (Hovmöller et al., 2002). Repulsive  
287 interactions with nearby E14 could also play a role. For L49I/I57V on the other hand there is a  
288 large non-additive effect. From the crystal structures a few subtle changes in the interaction  
289 energies that could contribute to stabilization were identified. However, none of the prediction  
290 methods that we used were able to pick up these effects. One explanation for this is that the  
291 changes FoldX and Rosetta make to a structure to accommodate a mutation are local. If long  
292 range changes are important to explain the change in stability the methods will miss them.  
293 Furthermore, errors may accumulate when multiple mutations are introduced (Figure 2).

294 In conclusion, we have generated a set of variants in CI2 with varying stabilities and most  
295 of them containing multiple amino acid substitutions. The data could contribute to optimizing  
296 stability predictors. Of particular interest is the synergistic effect of the two substitutions in  
297 L49I/I57V. Although we see small structural changes in the structure compared with the other  
298 structures in the mutant cycle, the presence of two distinct conformations of the Ile at position 49  
299 in the double mutant could point to effects of conformational entropy or conformational changes  
300 also contributing.

301

## 302 **Materials and methods**

### 303 *CI2 mutant libraries*

304 The wild-type CI2 sequence used here is UniProt: P01053, residues 22-84 with an additional N-  
305 terminal Met. The numbering we use, start at this Met, which is the numbering system commonly  
306 used in the literature. cDNA encoding this sequence was inserted into a pET22-mCherry vector  
307 between the *NdeI* and *HindIII* restriction sites to preserve the translation coupling using Gibson

308 assembly. The QuickChange Lightning II mutagenesis kit (Agilent) was used to create the I57A  
309 variant in the CI2\_WT\_pET22\_mCherry vector. Mutant libraries of CI2 WT and CI2 I57A were  
310 generated using the GeneMorph II Random mutagenesis kit (Agilent). The mutation frequency was  
311 aimed at 0-4 amino acid substitutions per gene by adjusting the initial target DNA and the number  
312 of amplification cycles. The PCR product from the random mutagenesis was used as a  
313 MEGAprimer for the insertion of the mutants into the CI2 WT or CI2 I57A backgrounds. The PCR  
314 products were transformed into MegaX DH10B T1<sup>R</sup> Electrocomp Cells (Invitrogen) following  
315 manufacturer's instructions and everything was plated on LB agar plates with 100 µg/mL  
316 ampicillin.

317 The CI2 libraries were transformed into electrocompetent Rosetta2(DE3)pLysS pSEVA631-IBpAP-  
318 GFP-ASV cells (Zutz et al., 2020). After recovery, the transformants were directly inoculated in 3  
319 mL LB medium containing 100 µg/mL ampicillin, 25 µg/mL chloramphenicol and 50 µg/mL  
320 spectinomycin and grown overnight at 37 °C and 180 rpm. Cells were transferred into fresh  
321 medium and grown at 30 °C and 250 rpm to an OD<sub>600</sub> of 0.5 – 0.7. Expression was induced by  
322 addition of 0.5 mM IPTG and the growth temperature of the culture was shifted to 30 °C.

323 1 h after induction cells were analyzed by flow cytometry (Instrument: BD FACS-Aria SORP  
324 cell sorter; Laser 1: 488 nm: >50 mW, Filter: 505LP, 515/20-nm FITC; Laser 2: 561 nm: >50 mW;  
325 Filter: 600LP, 610/20-nm PE-Texas Red). 100,000 cells expressing a CI2 WT mutant protein with  
326 increased GFP signal, and 100,000 cells expressing a CI2 I57A mutant protein with decreased GFP  
327 signal were sorted in 2 mL LB medium supplemented with antibiotics and grown overnight at 37 °C  
328 and 300 rpm. To further enrich the *E. coli* fraction harboring proteins with altered protein stability,  
329 protein expression was induced again and cells (100,000 events) were sorted as described above.  
330 The following day, the sorted cell population was analyzed 1 hour after induction of protein

331 expression by flow cytometry (Instrument: BD FACS-Aria SORP cell sorter; Laser 1: 488 nm: >50  
332 mW, Filter: 505LP, 515/20-nm FITC; Laser 2: 561 nm: >50 mW; Filter: 600LP, 610/20-nm PE-Texas  
333 Red). Single cells were sorted directly into 100 µl LB supplemented with antibiotics in 96 well  
334 culture plates and grown overnight at 37 °C and 300 rpm. The single cells were characterized by  
335 Sanger sequencing.

336

### 337 *Library preparation for NGS*

338 Samples from the CI2 WT library were extracted from each step of FACS selection for NGS. 2 mL  
339 culture was centrifuged for 10,000 x g for 2 minutes and plasmids purified using the NucleoSpin®  
340 Plasmid kit (Machery-Nagel). The CI2 genes were amplified using the Phusion Hot Start II DNA  
341 Polymerase (Thermo Scientific) and region of interest-specific primers with overhang adapters.  
342 The PCR amplicons were purified using AMPure XP beads (Beckman Coulter) following  
343 manufacturer's instructions. Dual indices and Illumina sequencing adapters (Nextera XT Index kit  
344 (Nextera v2 D)) were attached using the KAPA HiFi HotStart DNA polymerase. The amplicon  
345 libraries were purified using AMPure XP beads (Beckman Coulter) following manufacturer's  
346 instructions. Concentrations of the purified amplicon libraries were quantified using a Qubit® 2.0  
347 Fluorometer and the dsDNA broad range kit. To determine the average bp length, a bioanalyzer  
348 and the DNA 1000 kit (Agilent) was used following manufacturer's instructions. The libraries were  
349 normalized to 10 nM and all libraries were pooled. The samples were spiked with 5 % Phi-X control  
350 DNA (Illumina) and loaded onto the flow cell and sequenced on and then applied onto an Illumina  
351 MiSeq instrument.

352

### 353 *Cloning, Expression and stability of single sorted CI2 clones*

354 Glycerol stocks of single cells sorted from the CI2 libraries were used as DNA template in colony  
355 PCR using the Phusion Hot Start II High-Fidelity DNA polymerase (Thermo Scientific). CI2 genes  
356 were amplified and ligated into a pET11a vector using the *NdeI* and *BamHI* restriction sites. All  
357 clones were verified using Sanger sequencing. All protein expression were performed in  
358 BL21(DE3)pLysS. For small scale protein expression, the bacteria were grown in 2 ml ZYM5052  
359 autoinduction media in a 24 well cell culture plate with incubation at 37 °C for 4 hours followed by  
360 20 hours at 20 °C. Low expression level plasmids were expressed in 50 mL ZYM5052 autoinduction  
361 media. Cells were harvested by centrifugation at 5000 x g for 15 minutes. The pellet frozen at -20  
362 °C and resuspended in 10 mM Na-acetate, pH 4.4 before centrifugation at 20,000 x g for 30  
363 minutes. The supernatant was further diluted in the same buffer. The samples were applied onto a  
364 1 ml Resource S column equilibrated with 20 mM Na-acetate, pH 4.4 and step eluted with 20 mM  
365 Na-acetate, pH 4.4, 1 M NaCl. The the peak fraction was applied onto a Superdex 75 16/85 column  
366 equilibrated with 50 mM NH<sub>4</sub>HCO<sub>3</sub>, and the fractions containing CI2 were collected and lyophilized  
367 before dissolving, in 50 mM MES, pH 6.25. For expression of protein for structure determination  
368 the bacteria were grown in LB media. The expression was induced by 0.4 mM IPTG at OD<sub>600</sub> 0.6 –  
369 0.8. Cells were harvested by centrifugation at 5000 x g for 15 min and resuspended in 25 mM Tris-  
370 HCl, pH 8, 1 mM EDTA before lysis by two freeze-thaw cycles. The sample was cleared by  
371 centrifugation at 20,000 x g at 4 °C. Polyetylenimine was added to a concentration of 1 % and the  
372 sample centrifuged for 15 min at 20,000 x g. Ammonium sulphate was added to the supernatant  
373 to 70 % saturation, and left for 30 min at 4 °C before centrifugation at 20,000 x g. The pellet was  
374 resuspended in 25 mM Tris-HCl, pH 8 and heated at 40°C until all precipitate was solubilized. The  
375 samples were centrifuged at 20,000 x g for 10 min before size exclusion chromatography in 10 mM

376  $\text{NH}_4\text{HCO}_3$ . Peak fractions were pooled and lyophilized and finally resuspended in MilliQ water and  
377 dialysed against water.

378

### 379 *Equilibrium unfolding*

380 Protein concentrations were determined by absorbance at 280 nm measured on a NanoDrop 1000  
381 due to the low volume samples. Equilibrium stability in GuHCl was measured with a final protein  
382 concentration of 10  $\mu\text{M}$  at 13-16 concentrations of GuHCl evenly distributed in the range from 0 to  
383 5, 6 or 7 M depending on the stability of the variant. The degree of unfolding was followed by  
384 fluorescence measurements on a Prometheus NT.48 (nanoTemper technologies) using  
385 Prometheus NT.48 high sensitivity capillaries. The temperature was ramped from 15 to 95°C with  
386 a temperature increment of 1°C/min. Global analysis of temperature and solvent denaturation  
387 was performed as described (Hamborg et al., 2020).

388

### 389 *Computational prediction of stability and DnaK binding*

390 Version 4 of the FoldX energy function (Schymkowitz et al., 2005) was used to estimate the free-  
391 energy change upon mutations of Cl2, using the coordinates of the PDB entry 2Cl2 (McPhalen and  
392 James, 1987). The RepairPDB function of FoldX was first applied to the wild type structure. The  
393 resulting structure was used as input to the BuildModel function to generate the models of the  
394 investigated mutants and to evaluate their  $\Delta\Delta G_f$ .

395 The Rosetta energy function (Kellogg et al., 2010) in its cartesian version (Park et al., 2016)  
396 was also used to estimate  $\Delta\Delta G_f$ , using the coordinates of PDB entry 2Cl2. The wild-type structure  
397 was first relaxed in cartesian space with restrained backbone and sidechain coordinates. The  
398 resulting coordinates were then used to build the model of the investigated mutants and to

399 evaluate their  $\Delta\Delta G_f$  by means of the Cartesian\_ddg function. The calculations were repeated on  
400 five independent runs, whose results were then averaged to obtain the final values reported in the  
401 manuscript. The resulting difference in stability was multiplied by 1.44 to bring the  $\Delta\Delta G$  values  
402 from Rosetta energy units onto a scale corresponding to kJ/mol (Jepsen et al., 2020).

403         Looking at the mutational pattern observed in a multiple sequence alignment of  
404 homologous sequence, it is possible to build a global statistical model of the relative protein family  
405 variability (Marks et al., 2011), which takes into account not only single-site conservation, but also  
406 correlated mutations between site pairs. This approach aims at exploiting the structural and  
407 functional constraints encoded in the family evolution (Granata et al., 2017), assigning to each  
408 specific sequence a score related to the probability of being a good representative of that family  
409 (Figliuzzi et al., 2015). Even if this measure is more related to the general fitness of the sequence,  
410 it can also be used *bona fide* to judge the effect of a specific mutation on protein stability. In order  
411 to have a variation model which is statistically significant, we obtained a larger multiple sequence  
412 alignment containing Cl2 homologues by building a hidden Markov model of the protein family,  
413 based on 4 iterations of Jackhmmer (Finn et al., 2015) and extracting the sequences from the  
414 Uniprot Uniref100 database (Suzek et al., 2014). The sequence containing more than 50% of gaps  
415 with respect to wild-type sequence were excluded, together with the sequences sharing more  
416 than 90% of sequence identity, resulting in an alignment of 942 independent sequences. We then  
417 used the asymmetric plmDCA algorithm (Ekeberg et al., 2013) to calculate the parameters of the  
418 sequence model. The score of the wild-type sequence was then subtracted to the one of each  
419 analysed sequence to obtain the final values reported in the manuscript.

420         We used the Limbo algorithm (Durme et al., 2009) to predict DnaK binding sites in both  
421 wild-type and variant forms of Cl2.

422

423 *Crystallization, diffraction experiments and structure calculations*

424 CI2 WT, L49I and L49I/I57V were crystalized at 293 K in 40% (NH<sub>4</sub>)<sub>2</sub>SO<sub>4</sub>, 50 mM Tris-HCl, pH 8.0 at a  
425 protein concentration of 75 mg/ml. CI2 I57V were crystalized in 0.1 M Tris-HCl, 8% PEG 8000, pH  
426 8.5. Data for WT were collected on an inhouse setup with an Agilent SuperNova diffraction source  
427 (1.5406 Å) and an Atlas CCD detector. Data for L49I, I57V and L49I/I57V were collected at DESY,  
428 Hamburg, beamline P13 (0.9763 Å) equipped with a Pilatus 6M-F, S/N 60-0117-F detector.

429 The reflections were collected using autoPROC (Vonrhein et al., 2011), which also scales  
430 and merges the data using the CCP4 programs Pointless and Aimless (Winn et al., 2011) as well as  
431 Staraniso (<http://staraniso.globalphasing.org/cgi-bin/staraniso.cgi>). The latter program was  
432 employed because of pronounced anisotropic distribution of reflections. The structures were  
433 solved by molecular replacement using the CCP4 pogram Phaser (McCoy et al., 2007). The initial  
434 search model was wild-type CI2 (PDB code 2CI2). Later molecular replacement solutions were  
435 obtained using the higher resolution structures described in the present paper. The structures  
436 were carefully examined, adjusted and refined with Coot and Refmac5, respectively (Emsley et al.,  
437 2010; Murshudov et al., 2011). To make sure that the structures were not in a domain swapped  
438 configuration (Campos et al., 2019), molecular replacement solutions were also sought using the  
439 domain swapped structure with PDB accession code 6QIZ. These consistently yielded significantly  
440 worse statistics.

441

#### 442 **Acknowledgements**

443 This work was supported by the Novo Nordisk Foundation [grant numbers NNF15OC0016360 and  
444 NNF18OC0033926]. The authors thank Pia Skovgaard for technical assistance. KLL and KT are

445 members of Integrative Structural Biology at the University of Copenhagen ([www.isbuc.ku.dk](http://www.isbuc.ku.dk)). We  
446 thank Profs. F. Rousseau and J. Schymkowitz (VIB) for sharing the Limbo Software. We  
447 acknowledge excellent support at the P14 beamline operated by EMBL Hamburg at the PETRA III  
448 storage ring (DESY, Hamburg). We are grateful for support from the DANSCATT program of the  
449 Danish Council for Research and Innovation. We thank Thomas Lykke-Møller Sørensen (Aarhus  
450 University) for help with the data acquisition at DESY. Finally, we thank Pernille Harris for access to  
451 the in-house diffractometer at the Technical University of Denmark.

452

#### 453 **Competing interests**

454 ATN declare the following competing interests: Inventor on a patent that covers the folding sensor  
455 system used in the current work.

456

#### 457 **Data availability**

458 The atomic coordinates and structure factors for the structures presented in this work are  
459 deposited at the Protein Data Bank (<https://www.wwPDB.org>) under accession numbers 7A1H,  
460 7A3M, 7AOK and 7AON. Other data included in the figures and that support the findings of this  
461 study are available from the corresponding author upon reasonable request.



462 **References**

- 463 Bendová-Biedermannová L, Hobza P, Vondrášek J. 2008. Identifying stabilizing key residues in  
464 proteins using interresidue interaction energy matrix: Pair-Wise Interaction Energy Matrix. *Proteins*  
465 *Struct Funct Bioinform* **72**:402–413. doi:10.1002/prot.21938
- 466 Bershtein S, Segal M, Bekerman R, Tokuriki N, Tawfik DS. 2006. Robustness–epistasis link shapes the  
467 fitness landscape of a randomly drifting protein. *Nature* **444**:929–932. doi:10.1038/nature05385
- 468 Campos LA, Sharma R, Alvira S, Ruiz FM, Ibarra-Molero B, Sadqi M, Alfonso C, Rivas G, Sanchez-Ruiz  
469 JM, Garrido AR, Valpuesta JM, Muñoz V. 2019. Engineering protein assemblies with allosteric  
470 control via monomer fold-switching. *Nat Commun*, Nature Communications **10**:5703.  
471 doi:10.1038/s41467-019-13686-1
- 472 Capriotti E, Fariselli P, Casadio R. 2005. I-Mutant2.0: predicting stability changes upon mutation  
473 from the protein sequence or structure. *Nucleic Acids Res* **33**:W306–W310.  
474 doi:10.1093/nar/gki375
- 475 Dehouck Y, Grosfils A, Folch B, Gilis D, Bogaerts P, Rooman M. 2009. Fast and accurate predictions  
476 of protein stability changes upon mutations using statistical potentials and neural networks:  
477 PoPMuSiC-2.0. *Bioinformatics* **25**:2537–2543. doi:10.1093/bioinformatics/btp445
- 478 Durme JV, Maurer-Stroh S, Gallardo R, Wilkinson H, Rousseau F, Schymkowitz J. 2009. Accurate  
479 prediction of DnaK-peptide binding via homology modelling and experimental data. *PLoS Comput*  
480 *Biol* **5**:e1000475. doi:10.1371/journal.pcbi.1000475
- 481 Ekeberg M, Lökvist C, Lan Y, Weigt M, Aurell E. 2013. Improved contact prediction in proteins: Using  
482 pseudolikelihoods to infer Potts models. *Phys Rev E Stat Nonlin Soft Matter Phys* **87**:012707.  
483 doi:10.1103/physreve.87.012707
- 484 Emsley P, Lohkamp B, Scott WG, Cowtan K. 2010. Features and development of Coot. *Acta*  
485 *Crystallogr Sect D Biol Crystallogr* **66**:486–501. doi:10.1107/s0907444910007493
- 486 Figliuzzi M, Jacquier H, Schug A, Tenaillon O, Weigt M. 2015. Coevolutionary Landscape Inference  
487 and the Context-Dependence of Mutations in Beta-Lactamase TEM-1. *Mol Biol Evol* **33**:268–80.  
488 doi:10.1093/molbev/msv211
- 489 Finn RD, Clements J, Arndt W, Miller BL, Wheeler TJ, Schreiber F, Bateman A, Eddy SR. 2015. HMMER  
490 web server: 2015 update. *Nucleic Acids Res* **43**:W30–W38. doi:10.1093/nar/gkv397
- 491 Foit L, Morgan GJ, Kern MJ, Steimer LR, Hacht AA von, Titchmarsh J, Warriner SL, Radford SE,  
492 Bardwell JCA. 2009. Optimizing Protein Stability In Vivo. *Mol Cell*, Molecular Cell **36**:861–871.  
493 doi:10.1016/j.molcel.2009.11.022

- 494 Goldenzweig A, Goldsmith M, Hill SE, Gertman O, Laurino P, Ashani Y, Dym O, Unger T, Albeck S,  
495 Prilusky J, Lieberman RL, Aharoni A, Silman I, Sussman JL, Tawfik DS, Fleishman SJ. 2018.  
496 Automated Structure- and Sequence-Based Design of Proteins for High Bacterial Expression and  
497 Stability. *Mol Cell* **70**:380. doi:10.1016/j.molcel.2018.03.035
- 498 Granata D, Ponzoni L, Micheletti C, Carnevale V. 2017. Patterns of coevolving amino acids unveil  
499 structural and dynamical domains. *Proc Natl Acad Sci USA* **114**:E10612–E10621.  
500 doi:10.1073/pnas.1712021114
- 501 Gromiha MM, Anoocha P, Huang L-T. 2016. Applications of Protein Thermodynamic Database for  
502 Understanding Protein Mutant Stability and Designing Stable Mutants. *Methods Mol Biol*  
503 **1415**:71–89. doi:10.1007/978-1-4939-3572-7\_4
- 504 Guerois R, Nielsen JE, Serrano L. 2002. Predicting Changes in the Stability of Proteins and Protein  
505 Complexes: A Study of More Than 1000 Mutations. *J Mol Biol, Journal of Molecular Biology*  
506 **320**:369–387. doi:10.1016/s0022-2836(02)00442-4
- 507 Hamborg L, Horsted EW, Johansson KE, Willemoës M, Lindorff-Larsen K, Teilum K. 2020. Global  
508 analysis of protein stability by temperature and chemical denaturation. *Anal Biochem*  
509 **605**:113863. doi:10.1016/j.ab.2020.113863
- 510 Hovmöller S, Zhou T, Ohlson T. 2002. Conformations of amino acids in proteins. *Acta Crystallogr Sect*  
511 *D Biol Crystallogr* **58**:768–776. doi:10.1107/s0907444902003359
- 512 Itzhaki LS, Otzen DE, Fersht AR. 1995. The Structure of the Transition State for Folding of  
513 Chymotrypsin Inhibitor 2 Analysed by Protein Engineering Methods: Evidence for a Nucleation-  
514 condensation Mechanism for Protein Folding. *J Mol Biol, Journal of molecular biology* **254**:260–  
515 288. doi:10.1006/jmbi.1995.0616
- 516 Jackson SE, Fersht AR. 1991a. Folding of chymotrypsin inhibitor 2. 1. Evidence for a two-state  
517 transition. *Biochemistry, Biochemistry* **30**:10428–35.
- 518 Jackson SE, Fersht AR. 1991b. Folding of chymotrypsin inhibitor 2. 2. Influence of proline  
519 isomerization on the folding kinetics and thermodynamic characterization of the transition state  
520 of folding. *Biochemistry, Biochemistry* **30**:10436–43.
- 521 Jackson SE, Moracci M, elMasry N, Johnson CM, Fersht AR. 1993. Effect of cavity-creating mutations  
522 in the hydrophobic core of chymotrypsin inhibitor 2. *Biochemistry, Biochemistry* **32**:11259–69.
- 523 Jepsen MM, Fowler DM, Hartmann-Petersen R, Stein A, Lindorff-Larsen K. 2020. Classifying disease-  
524 associated variants using measures of protein activity and stability In: Pey AL, editor. Protein  
525 Homeostasis Diseases. Academic Press. pp. 91–107. doi:10.1016/b978-0-12-819132-3.00005-1
- 526 Jochens H, Aerts D, Bornscheuer UT. 2010. Thermostabilization of an esterase by alignment-guided  
527 focussed directed evolution. *Protein Eng Des Sel* **23**:903–909. doi:10.1093/protein/gzq071

- 528 Kaufmann KW, Lemmon GH, DeLuca SL, Sheehan JH, Meiler J. 2010. Practically Useful: What the  
529 Rosetta Protein Modeling Suite Can Do for You. *Biochemistry* **49**:2987–2998.  
530 doi:10.1021/bi902153g
- 531 Kellogg EH, Leaver-Fay A, Baker D. 2010. Role of conformational sampling in computing mutation-  
532 induced changes in protein structure and stability: Conformational Sampling in Computing  
533 Mutation-Induced Changes. *Proteins Struct Funct Bioinform* **79**:830–838.  
534 doi:10.1002/prot.22921
- 535 Khan S, Vihinen M. 2010. Performance of protein stability predictors. *Hum Mutat* **31**:675–684.  
536 doi:10.1002/humu.21242
- 537 Lawrence C, Kuge J, Ahmad K, Plaxco KW. 2010. Investigation of an anomalously accelerating  
538 substitution in the folding of a prototypical two-state protein. *J Mol Biol, Journal of Molecular*  
539 *Biology* **403**:446–58. doi:10.1016/j.jmb.2010.08.049
- 540 Marks DS, Colwell LJ, Sheridan R, Hopf TA, Pagnani A, Zecchina R, Sander C. 2011. Protein 3D  
541 Structure Computed from Evolutionary Sequence Variation. *PLoS ONE, PloS one* **6**:e28766.  
542 doi:10.1371/journal.pone.0028766
- 543 McCoy AJ, Grosse-Kunstleve RW, Adams PD, Winn MD, Storoni LC, Read RJ. 2007. Phaser  
544 crystallographic software. *J Appl Crystallogr* **40**:658–674. doi:10.1107/s0021889807021206
- 545 McPhalen CA, James MN. 1987. Crystal and molecular structure of the serine proteinase inhibitor  
546 CI-2 from barley seeds. *Biochemistry, Biochemistry* **26**:261–9.
- 547 Modarres HP, Mofrad MR, Sanati-Nezhad A. 2016. Protein thermostability engineering. *RSC Adv*  
548 **6**:115252–115270. doi:10.1039/c6ra16992a
- 549 Murshudov GN, Skubák P, Lebedev AA, Pannu NS, Steiner RA, Nicholls RA, Winn MD, Long F, Vagin  
550 AA. 2011. REFMAC5 for the refinement of macromolecular crystal structures. *Acta Crystallogr*  
551 *Sect D Biol Crystallogr* **67**:355–67. doi:10.1107/s0907444911001314
- 552 Myers JK, Pace CN, Scholtz JM. 1995. Denaturant m values and heat capacity changes: Relation to  
553 changes in accessible surface areas of protein unfolding. *Protein Sci, Protein science : a*  
554 *publication of the Protein Society* **4**:2138–2148. doi:10.1002/pro.5560041020
- 555 Neira JL, Itzhaki LS, Ladurner AG, Davis B, Gay G de P, Fersht AR. 1997. Following co-operative  
556 formation of secondary and tertiary structure in a single protein module. *J Mol Biol* **268**:185–197.  
557 doi:10.1006/jmbi.1997.0932
- 558 Pandurangan AP, Ochoa-Montaña B, Ascher DB, Blundell TL. 2017. SDM: a server for predicting  
559 effects of mutations on protein stability. *Nucleic Acids Res* **45**:W229–W235.  
560 doi:10.1093/nar/gkx439

- 561 Park H, Bradley P, Greisen P, Liu Y, Mulligan VK, Kim DE, Baker D, DiMaio F. 2016. Simultaneous  
562 Optimization of Biomolecular Energy Functions on Features from Small Molecules and  
563 Macromolecules. *J Chem Theory Comput* **12**:6201–6212. doi:10.1021/acs.jctc.6b00819
- 564 Parthiban V, Gromiha MM, Schomburg D. 2006. CUPSAT: prediction of protein stability upon point  
565 mutations. *Nucleic Acids Res* **34**:W239–W242. doi:10.1093/nar/gkl190
- 566 Potapov V, Cohen M, Schreiber G. 2009. Assessing computational methods for predicting protein  
567 stability upon mutation: good on average but not in the details. *Protein Eng Des Sel, Protein*  
568 *engineering, design & selection* : PEDS **22**:553–560. doi:10.1093/protein/gzp030
- 569 Reetz MT, Carballeira JD, Vogel A. 2006. Iterative Saturation Mutagenesis on the Basis of B Factors  
570 as a Strategy for Increasing Protein Thermostability. *Angew Chem Int Ed Engl* **45**:7745–7751.  
571 doi:10.1002/anie.200602795
- 572 Rohl CA, Strauss CEM, Misura KMS, Baker D. 2004. Protein structure prediction using Rosetta.  
573 *Methods Enzymol* **383**:66–93. doi:10.1016/s0076-6879(04)83004-0
- 574 Sarkisyan KS, Bolotin DA, Meer MV, Usmanova DR, Mishin AS, Sharonov GV, Ivankov DN, Bozhanova  
575 NG, Baranov MS, Soylemez O, Bogatyreva NS, Vlasov PK, Egorov ES, Logacheva MD, Kondrashov  
576 AS, Chudakov DM, Putintseva EV, Mamedov IZ, Tawfik DS, Lukyanov KA, Kondrashov FA. 2016.  
577 Local fitness landscape of the green fluorescent protein. *Nature* **533**:397–401.  
578 doi:10.1038/nature17995
- 579 Schymkowitz J, Borg J, Stricher F, Nys R, Rousseau F, Serrano L. 2005. The FoldX web server: an  
580 online force field. *Nucleic Acids Res* **33**:W382–W388. doi:10.1093/nar/gki387
- 581 Stein A, Fowler DM, Hartmann-Petersen R, Lindorff-Larsen K. 2019. Biophysical and Mechanistic  
582 Models for Disease-Causing Protein Variants. *Trends Biochem Sci* **44**:575–588.  
583 doi:10.1016/j.tibs.2019.01.003
- 584 Steipe B, Schiller B, Plückthun A, Steinbacher S. 1994. Sequence Statistics Reliably Predict Stabilizing  
585 Mutations in a Protein Domain. *J Mol Biol* **240**:188–192. doi:10.1006/jmbi.1994.1434
- 586 Sullivan BJ, Nguyen T, Durani V, Mathur D, Rojas S, Thomas M, Syu T, Magliery TJ. 2012. Stabilizing  
587 Proteins from Sequence Statistics: The Interplay of Conservation and Correlation in  
588 Triosephosphate Isomerase Stability. *J Mol Biol* **420**:384–399. doi:10.1016/j.jmb.2012.04.025
- 589 Suzek BE, Wang Y, Huang H, McGarvey PB, Wu CH, Consortium U. 2014. UniRef clusters: a  
590 comprehensive and scalable alternative for improving sequence similarity searches.  
591 *Bioinformatics* **31**:926–32. doi:10.1093/bioinformatics/btu739
- 592 Trudeau DL, Lee TM, Arnold FH. 2014. Engineered thermostable fungal cellulases exhibit efficient  
593 synergistic cellulose hydrolysis at elevated temperatures. *Biotechnol Bioeng* **111**:2390–2397.  
594 doi:10.1002/bit.25308

- 595 Vonrhein C, Flensburg C, Keller P, Sharff A, Smart O, Paciorek W, Womack T, Bricogne G. 2011. Data  
596 processing and analysis with the autoPROC toolbox. *Acta Crystallogr D Biol Crystallogr* **67**:293–  
597 302. doi:10.1107/s0907444911007773
- 598 Wijma HJ, Floor RJ, Jekel PA, Baker D, Marrink SJ, Janssen DB. 2014. Computationally designed  
599 libraries for rapid enzyme stabilization. *Protein Eng Des Sel* **27**:49–58.  
600 doi:10.1093/protein/gzt061
- 601 Winn MD, Ballard CC, Cowtan KD, Dodson EJ, Emsley P, Evans PR, Keegan RM, Krissinel EB, Leslie  
602 AGW, McCoy A, McNicholas SJ, Murshudov GN, Pannu NS, Potterton EA, Powell HR, Read RJ,  
603 Vagin A, Wilson KS. 2011. Overview of the CCP4 suite and current developments. *Acta Crystallogr*  
604 *D Biol Crystallogr*, *Acta crystallographica Section D, Biological crystallography* **67**:235–242.  
605 doi:10.1107/s0907444910045749
- 606 Yamashiro K, Yokobori S-I, Koikeda S, Yamagishi A. 2010. Improvement of *Bacillus circulans*  $\beta$ -  
607 amylase activity attained using the ancestral mutation method. *Protein Eng Des Sel* **23**:519–528.  
608 doi:10.1093/protein/gzq021
- 609 Zutz A, Hamborg L, Pedersen LE, Kassem MM, Papaleo E, Koza A, Herrgård MJ, Teilum K, Lindorff-  
610 Larsen K, Nielsen AT. 2020. A dual-reporter system for investigating and optimizing protein  
611 translation and folding in *E. coli*. *bioRxiv* 2020.09.18.303453. doi:10.1101/2020.09.18.303453

612

613
